# Supplementary material for: Selection and thermostability suggest G-quadruplexes are novel functional elements of the human genome
Source: HighWire-hosted journal article supplement (doi:10.1101/gr.269589.120), 2021-06-29
Supplement: Supplemental_Tables_.xlsx [file Supplemental_Tables_.xlsx]

## Sheet: Table S1
Table S1. The descriptive statistics for G4 loci on the reference and reverse complement strands genome-wide, in the non-coding non-repetitive subgenome (NCNR), and at genic components and non-genic functional regions.
Elements or regions	Number of G4 loci located completely within*	Number of G4 loci**	Number of bases in G4 loci	Length of components or regions (bases)	Number of Gs at components or regions	G-content	Density (loci per 1k bases)	Density corrected by G-content (loci per 1k bases)	Coverage (per base)	Coverage corrected by G-content (per base)
Genome-wide	670072	670072	24405199	5761626572	1186291952	0.205895	0.116299	0.564846	0.00423582	0.0205727
NCNR***	12302	14436.8	493461	453880076	36969261	0.0814516	0.0318075	0.390508	0.00108721	0.0133479
Genic components
Upstream regions	31171	32618.1	1299592	56370000	14335714	0.254315	0.578643	2.2753	0.0230547	0.0906542
Validated promoters (FANTOM)	1080	5537.82	524288	7866708	2286490	0.290654	0.703956	2.42197	0.0666464	0.229298
CpG islands	57714	59856.4	2.41106e+06	41722166	14379421	0.344647	1.43464	4.16264	0.0577885	0.167674
5'UTRs non-transcribed	4971	5825.13	217749	14099132	3750249	0.265991	0.413155	1.55326	0.0154441	0.0580625
5'UTRs transcribed	6022	6746.61	261160	14099132	3665705	0.259995	0.478512	1.84047	0.0185231	0.0712441
Exons non-transcribed	3287	3944.14	147634	33491690	8849741	0.264237	0.117765	0.445679	0.00440808	0.0166823
Exons transcribed	8529	9741.22	380767	33491690	8742120	0.261024	0.290855	1.11429	0.011369	0.0435555
Introns non-transcribed	159511	162002	6.08888e+06	1142914353	241167509	0.211011	0.141745	0.671742	0.00532751	0.0252475
Introns transcribed	140616	142787	5.30953e+06	1142914353	230804333	0.201944	0.124933	0.618651	0.00464561	0.0230045
3' UTRs non-transcribed	6849	7031.79	244138	34120545	7492248	0.219582	0.206087	0.938542	0.00715516	0.0325854
3' UTRs transcribed	8675	8924	321466	34120545	7412375	0.217241	0.261543	1.20393	0.00942148	0.0433688
Downstream regions	14014	14324.3	534643	55975462	12689666	0.226701	0.255903	1.12882	0.00955138	0.0421322
Non-genic functional regions
Replication origins	259484	266995	1.04508e+07	333631668	93256581	0.27952	0.800269	2.86302	0.0313245	0.112065
eQTLs	16566	574.751	21626	2385254	626896	0.262821	0.24096	0.91682	0.00906654	0.034497
Enhancers	11886	12698	461734	35997806	8406035	0.233515	0.352745	1.51059	0.0128267	0.0549289
TAD boundary regions	168933	169234	6.14643e+06	1085400000	232514903	0.21422	0.155919	0.727843	0.00566283	0.0264346
Recombination hotspots	1147	1315.94	3474	8885494	1856228	0.208905	0.1481	0.708932	0.000390974	0.00187154
* Used in Fig. 3 and in to compute density
** If a partial G4 locus was contained by a component or region, we used the fraction of its length in this element or region. Used to compute coverage and in Fig. 4*
*** Non-coding non-repetitive subgenome

## Sheet: Table S2
Table S2. Analysis of fold differences in density (A) and coverage (B) of G4 loci at different genic components and non-genic functional genomic regions vs. these genome-wide or in the NCNR subgenome.
Fisher's exact test was used to evaluate the significance of fold differences. P-values were adjusted for multiple testing using the Bonferroni correction. Fold differences were evaluated for G4 coverage and density both uncorrected and corrected for G-content.
(A) DENSITY
Components or regions	Fold difference in density vs. genome-wide average	Fisher's exact test p-value for density comparison vs. genome-wide average	P-value adjusted for multiple testing (Bonferroni correction)	Fold difference in density vs. NCNR	Fisher's exact test p-value for density comparison vs. NCNR	P-value adjusted for multiple testing (Bonferroni correction)	Fold difference in G-corrected density vs. genome-wide average	Fisher's exact test p-value for G-corrected density comparison vs. genome-wide average	P-value adjusted for multiple testing (Bonferroni correction)	Fold difference in G-corrected density vs. NCNR	Fisher's exact test p-value for G-corrected density comparison vs. NCNR	P-value adjusted for multiple testing (Bonferroni correction)
Genome-wide	1	n/a	n/a	3.65634	< 2.2e-16	< 3.96e-15	1	n/a	n/a	1.44644	< 2.2e-16	< 3.96e-15
NCNR*	0.273498	< 2.2e-16	< 3.96e-15	1	n/a	n/a	0.691354	< 2.2e-16	< 3.96e-15	1	n/a	n/a
Genic components
Upstream regions	4.97547	< 2.2e-16	< 3.96e-15	18.192	< 2.2e-16	< 3.96e-15	4.02819	< 2.2e-16	< 3.96e-15	5.82651	< 2.2e-16	< 3.96e-15
Validated promoters (FANTOM)	6.05298	< 2.2e-16	< 3.96e-15	22.1317	< 2.2e-16	< 3.96e-15	4.28785	< 2.2e-16	< 3.96e-15	6.2021	< 2.2e-16	< 3.96e-15
CpG islands	12.3358	< 2.2e-16	< 3.96e-15	45.1039	< 2.2e-16	< 3.96e-15	7.36952	< 2.2e-16	< 3.96e-15	10.6595	< 2.2e-16	< 3.96e-15
5'UTRs non-transcribed	3.55252	< 2.2e-16	< 3.96e-15	12.9892	< 2.2e-16	< 3.96e-15	2.74989	< 2.2e-16	< 3.96e-15	3.97754	< 2.2e-16	< 3.96e-15
5'UTRs transcribed	4.1145	< 2.2e-16	< 3.96e-15	15.044	< 2.2e-16	< 3.96e-15	3.25835	< 2.2e-16	< 3.96e-15	4.713	< 2.2e-16	< 3.96e-15
Exons non-transcribed	1.0126	< 2.2e-16	< 3.96e-15	3.70242	< 2.2e-16	< 3.96e-15	0.789027	< 2.2e-16	< 3.96e-15	1.14128	< 2.2e-16	< 3.96e-15
Exons transcribed	2.50092	< 2.2e-16	< 3.96e-15	9.14421	< 2.2e-16	< 3.96e-15	1.97273	< 2.2e-16	< 3.96e-15	2.85342	< 2.2e-16	< 3.96e-15
Introns non-transcribed	1.2188	< 2.2e-16	< 3.96e-15	4.45633	< 2.2e-16	< 3.96e-15	1.18925	< 2.2e-16	< 3.96e-15	1.72017	< 2.2e-16	< 3.96e-15
Introns transcribed	1.07424	< 2.2e-16	< 3.96e-15	3.92777	< 2.2e-16	< 3.96e-15	1.09526	< 2.2e-16	< 3.96e-15	1.58422	< 2.2e-16	< 3.96e-15
3' UTRs non-transcribed	1.77204	< 2.2e-16	< 3.96e-15	6.47918	< 2.2e-16	< 3.96e-15	1.66159	< 2.2e-16	< 3.96e-15	2.40338	< 2.2e-16	< 3.96e-15
3' UTRs transcribed	2.24888	< 2.2e-16	< 3.96e-15	8.22268	< 2.2e-16	< 3.96e-15	2.13144	< 2.2e-16	< 3.96e-15	3.08299	< 2.2e-16	< 3.96e-15
Downstream regions	2.20039	< 2.2e-16	< 3.96e-15	8.04537	< 2.2e-16	< 3.96e-15	1.99845	< 2.2e-16	< 3.96e-15	2.89063	< 2.2e-16	< 3.96e-15
Non-genic functional regions
Replication origins	6.88113	< 2.2e-16	< 3.96e-15	25.1597	< 2.2e-16	< 3.96e-15	5.06867	< 2.2e-16	< 3.96e-15	7.33151	< 2.2e-16	< 3.96e-15
eQTLs	2.0719	< 2.2e-16	< 3.96e-15	7.57556	< 2.2e-16	< 3.96e-15	1.62313	< 2.2e-16	< 3.96e-15	2.34776	< 2.2e-16	< 3.96e-15
Enhancers	3.03308	< 2.2e-16	< 3.96e-15	11.09	< 2.2e-16	< 3.96e-15	2.67433	< 2.2e-16	< 3.96e-15	3.86825	< 2.2e-16	< 3.96e-15
TAD boundary regions	1.34067	< 2.2e-16	< 3.96e-15	4.90195	< 2.2e-16	< 3.96e-15	1.28857	< 2.2e-16	< 3.96e-15	1.86383	< 2.2e-16	< 3.96e-15
Recombination hotspots	1.27344	< 2.2e-16	< 3.96e-15	4.65612	< 2.2e-16	< 3.96e-15	1.25509	< 2.2e-16	< 3.96e-15	1.81541	< 2.2e-16	< 3.96e-15
(B) COVERAGE
Components or regions	Fold difference in coverage vs. genome-wide average	Fisher's exact test p-value for coverage comparison vs. genome-wide average	P-value adjusted for multiple testing (Bonferroni correction)	Fold difference in coverage vs. NCNR	Fisher's exact test p-value for coverage comparison vs. NCNR	P-value adjusted for multiple testing (Bonferroni correction)	Fold difference in G-corrected coverage vs. genome-wide average	Fisher's exact test p-value for G-corrected coverage comparison vs. genome-wide average	P-value adjusted for multiple testing (Bonferroni correction)	Fold difference in G-corrected coverage vs. NCNR	Fisher's exact test p-value for G-corrected coverage comparison vs. NCNR	P-value adjusted for multiple testing (Bonferroni correction)
Genome-wide	1	n/a	n/a	3.89606	< 2.2e-16	< 3.96e-15	1	n/a	n/a	1.54127	< 2.2e-16	< 3.96e-15
NCNR*	0.25667	< 2.2e-16	< 3.96e-15	1	n/a	n/a	0.648816	< 2.2e-16	< 3.96e-15	1	n/a	n/a
Genic components
Upstream regions	5.44279	< 2.2e-16	< 3.96e-15	21.2054	< 2.2e-16	< 3.96e-15	4.40653	< 2.2e-16	< 3.96e-15	6.79166	< 2.2e-16	< 3.96e-15
Validated promoters (FANTOM)	15.734	< 2.2e-16	< 3.96e-15	61.3007	< 2.2e-16	< 3.96e-15	11.1458	< 2.2e-16	< 3.96e-15	17.1786	< 2.2e-16	< 3.96e-15
CpG islands	13.6428	< 2.2e-16	< 3.96e-15	53.1532	< 2.2e-16	< 3.96e-15	8.15034	< 2.2e-16	< 3.96e-15	12.5619	< 2.2e-16	< 3.96e-15
5'UTRs non-transcribed	3.64608	< 2.2e-16	< 3.96e-15	14.2054	< 2.2e-16	< 3.96e-15	2.82231	< 2.2e-16	< 3.96e-15	4.34995	< 2.2e-16	< 3.96e-15
5'UTRs transcribed	4.37298	< 2.2e-16	< 3.96e-15	17.0374	< 2.2e-16	< 3.96e-15	3.46305	< 2.2e-16	< 3.96e-15	5.33749	< 2.2e-16	< 3.96e-15
Exons non-transcribed	1.04067	< 2.2e-16	< 3.96e-15	4.0545	< 2.2e-16	< 3.96e-15	0.810896	< 2.2e-16	< 3.96e-15	1.24981	< 2.2e-16	< 3.96e-15
Exons transcribed	2.68402	< 2.2e-16	< 3.96e-15	10.4571	< 2.2e-16	< 3.96e-15	2.11715	< 2.2e-16	< 3.96e-15	3.2631	< 2.2e-16	< 3.96e-15
Introns non-transcribed	1.25773	< 2.2e-16	< 3.96e-15	4.90018	< 2.2e-16	< 3.96e-15	1.22724	< 2.2e-16	< 3.96e-15	1.8915	< 2.2e-16	< 3.96e-15
Introns transcribed	1.09674	< 2.2e-16	< 3.96e-15	4.27298	< 2.2e-16	< 3.96e-15	1.11821	< 2.2e-16	< 3.96e-15	1.72346	3.7246e-15	< 3.96e-15
3' UTRs non-transcribed	1.6892	< 2.2e-16	< 3.96e-15	6.58124	< 2.2e-16	< 3.96e-15	1.58392	< 2.2e-16	< 3.96e-15	2.44124	< 2.2e-16	< 3.96e-15
3' UTRs transcribed	2.22424	< 2.2e-16	< 3.96e-15	8.66577	< 2.2e-16	< 3.96e-15	2.10808	< 2.2e-16	< 3.96e-15	3.24912	3.7246e-15	6.7e-14
Downstream regions	2.25491	< 2.2e-16	< 3.96e-15	8.78526	< 2.2e-16	< 3.96e-15	2.04797	< 2.2e-16	< 3.96e-15	3.15647	0.000313791	0.00565
Non-genic functional regions
Replication origins	7.39514	< 2.2e-16	< 3.96e-15	28.8119	< 2.2e-16	< 3.96e-15	5.44729	< 2.2e-16	< 3.96e-15	8.39575	< 2.2e-16	< 3.96e-15
eQTLs	2.14045	5.2692e-13	0	8.3393	< 2.2e-16	< 3.96e-15	1.67683	< 2.2e-16	< 3.96e-15	2.58445	< 2.2e-16	< 3.96e-15
Enhancers	3.02816	< 2.2e-16	< 3.96e-15	11.7979	< 2.2e-16	< 3.96e-15	2.66999	< 2.2e-16	< 3.96e-15	4.11518	< 2.2e-16	< 3.96e-15
TAD boundary regions	1.33689	< 2.2e-16	< 3.96e-15	5.20861	< 2.2e-16	< 3.96e-15	1.28494	< 2.2e-16	< 3.96e-15	1.98043	< 2.2e-16	< 3.96e-15
Recombination hotspots	0.092302	< 2.2e-16	< 3.96e-15	0.359614	< 2.2e-16	< 3.96e-15	0.090972	< 2.2e-16	< 3.96e-15	0.140212	< 2.2e-16	< 3.96e-15
*Non-coding non-repetitive subgenome

## Sheet: Table S3
Table S3. Fold differences in G4 coverage and density between the non-transcribed and transcribed strands of genic elements.
Both uncorrected and corrected for G-content coverage and density were considered. The significance in differences was evaluated using Fisher's exact test (p-values are shown). P-values were adjusted for multiple testing using the Bonferroni correction.
Genic components	Fold difference in density between non-transcribed and transcribed strands	Fisher's exact test p-value for density comparison	P-value adjusted for multiple testing (Bonferroni correction)	Fold difference in G-content-corrected density between non-transcribed and transcribed strands	Fisher's exact test p-value for G-corrected density comparison	P-value adjusted for multiple testing (Bonferroni correction)	Fold difference in coverage between non-transcribed and transcribed strands	Fisher's exact test p-value for coverage comparison	P-value adjusted for multiple testing (Bonferroni correction)	Fold difference in G-content-corrected coverage between non-transcribed and transcribed strands	Fisher's exact test p-value for G-corrected coverage comparison	P-value adjusted for multiple testing (Bonferroni correction)
5' UTRs	0.863416	< 2.2e-16	< 8.8E-16	0.843951	< 2.2e-16	< 8.8E-16	0.833776	< 2.2e-16	< 8.8E-16	0.81498	< 2.2e-16	< 8.8E-16
Exons	0.404892	< 2.2e-16	< 8.8E-16	0.399968	< 2.2e-16	< 8.8E-16	0.387728	< 2.2e-16	< 8.8E-16	0.383013	< 2.2e-16	< 8.8E-16
Introns	1.13457	< 2.2e-16	< 8.8E-16	1.08582	< 2.2e-16	< 8.8E-16	1.14678	< 2.2e-16	< 8.8E-16	1.09751	< 2.2e-16	< 8.8E-16
3' UTRs	0.606214	< 2.2e-16	< 8.8E-16	0.659162	< 2.2e-16	< 8.8E-16	0.649267	< 2.2e-16	< 8.8E-16	0.705975	< 2.2e-16	< 8.8E-16

## Sheet: Table S4
Table S4. Comparison of median G4 stabiity scores at genic components and non-genic functional regions vs. these in the rest of the genome or in the non-coding non-repetitive subgenome (NCNR).
P-values of permutation tests (with 10,000 permutations) are shown. P-values were adjusted for multiple testing using the Bonferroni correction.
Components or regions	Median stability	Median stability in the rest of the genome	Median stability divided by that genome-wide	Median stabiity divided by that in the rest of the genome	Median stability divided by that in the NCNR	P-value of permutation test vs. rest of the genome	P-value from previous column adjusted for multiple testing (Bonferroni correction)	P-value of permutation test vs. NCNR	P-value from previous column adjusted for multiple testing (Bonferroni correction)
Genome-wide	19.54		1		1.43782	n/a	n/a	n/a	n/a
NCNR*	13.59		0.695496		1	n/a	n/a	n/a	n/a
Genic components
Upstream regions	21.85	19.33	1.11822	1.13037	1.6078	0.0001	0.0017	0.0001	0.0017
Validated promoters (FANTOM)	22.315	19.11	1.14202	1.16771	1.64202	0.0001	0.0017	0.0001	0.0017
CpG islands	20.01	19.35	1.02405	1.03411	1.47241	0.4344	1	0.0001	0.0017
5'UTRs non-transcribed	17.07	19.49	0.873593	0.875834	1.25607	0.0001	0.0017	0.0001	0.0017
5'UTRs transcribed	18.35	19.17	0.939099	0.957225	1.35026	0.0001	0.0017	0.0001	0.0017
Exons non-transcribed	11.97	20.18	0.61259	0.593162	0.880795	0.0001	0.0017	0.0001	0.0017
Exons transcribed	16.51	19.27	0.844933	0.856772	1.21486	0.0001	0.0017	0.0001	0.0017
Introns non-transcribed	19.41	19.48	0.993347	0.996407	1.42826	0.0178	0.3026	0.0001	0.0017
Introns transcribed	20.1	19.475	1.02866	1.03209	1.47903	0.0001	0.0017	0.0001	0.0017
3' UTRs non-transcribed	17.81	20.06	0.911464	0.887836	1.31052	0.0001	0.0017	0.0001	0.0017
3' UTRs transcribed	19.11	19.82	0.977994	0.964178	1.40618	0.0435	0.7395	0.0001	0.0017
Downstream regions	19.75	19.56	1.01075	1.00971	1.45327	0.4964	1	0.0001	0.0017
Non-genic functional regions
Replication origins	21.61	17.86	1.10594	1.20997	1.59014	0.0001	0.0017	0.0001	0.0017
eQTLs	21.95	19.41	1.12334	1.13086	1.61516	0.0001	0.0017	0.0001	0.0017
Enhancers	22.365	19.53	1.14458	1.14516	1.6457	0.0001	0.0017	0.0001	0.0017
TAD boundary regions	19.23	19.6	0.984135	0.981122	1.41501	0.0001	0.0017	0.0001	0.0017
Recombination hotspots	20.81	19.48	1.06499	1.06828	1.53127	0.4356	1	0.0001	0.0017
*Non-coding non-repetitive subgenome

## Sheet: Table S5
Table S5. Comparison of median G4 stabiity scores between non-transcribed and transcribed strands at genic components.
P-values of permutation tests (with 10,000 permutations) are shown. P-values were adjusted for multiple testing using the Bonferroni correction.
Genic components	Fold difference in median stability scores between non-transcribed vs. transcribed strands	Permutation test p-value	P-value adjusted for multiple testing (Bonferroni correction)
5'UTRs	0.930245	0.0001	0.0004
Exons	0.725015	0.0001	0.0004
Introns	0.965672	0.0001	0.0004
3'UTRs	0.931973	0.0005	0.002

## Sheet: Table S6
Table S6. Comparison of the proportions of polymorphic and fixed subsitutions (HKA test). Odds ratio is the probability of a site to be polymorphic if it is located within a G4 locus.
It was computed with Fisher's exact test (p-values are shown). P-values were adjusted for multiple testing using the Bonferroni correction.
	Odds ratio at all G4s against odds ratio of 1			Odds ratio at stable G4s against odds ratio of 1			Odds ratio at unstable G4s against odds ratio of 1			Odds ratio at stable vs. unstable G4s
	Odds ratio	HKA p-value (Fisher’s exact test) comparing with odds ratio of 1	P-value adjusted for multiple testing (Bonferroni correction)	Odds ratio	HKA p-value (Fisher’s exact test) comparing with odds ratio of 1	P-value adjusted for multiple testing (Bonferroni correction)	Odds ratio	HKA p-value (Fisher’s exact test) comparing with odds ratio of 1	P-value adjusted for multiple testing (Bonferroni correction)	Odds ratio	HKA p-value (Fisher’s exact test) comparing stable vs. unstable	P-value adjusted for multiple testing (Bonferroni correction)
NCNR*	1.19758	< 2.2e-16	< 3.5e-15	1.34878	< 2.2e-16	< 3.5e-15	1.08074	0.000249989	0.00399982	1.24803	< 2.2e-16	< 3.5e-15
Genic components
Upstream regions	1.40874	< 2.2e-16	< 3.5e-15	1.55237	< 2.2e-16	< 3.5e-15	1.1157	6.8098e-07	1.08957e-05	1.39136	< 2.2e-16	< 3.5e-15
CpG islands	1.16241	< 2.2e-16	< 3.5e-15	1.27204	< 2.2e-16	< 3.5e-15	0.996221	0.807918	1	1.27687	8.64027e-10	1.38244e-08
5' UTR non-transcribed	1.24872	3.98695e-12	0	1.42692	< 2.2e-16	< 3.5e-15	1.07311	0.13085	1	1.32969	4.74794e-06	7.5967e-05
5' UTR transcribed	1.2361	2.3499e-13	0	1.37061	< 2.2e-16	< 3.5e-15	1.07782	0.0907024	1	1.27166	2.08643e-05	0.000333829
Exons non-transcribed	0.938872	0.306225	1	1.05438	0.501746	1	1.0439	0.437268	1	1.01004	0.924491	1
Exons transcribed	1.22434	4.60533e-14	0	1.40953	< 2.2e-16	< 3.5e-15	1.05661	0.153005	1	1.33399	3.3793e-08	5.40687e-07
Introns non-transcribed	1.27777	< 2.2e-16	< 3.5e-15	1.44501	< 2.2e-16	< 3.5e-15	1.03818	0.0421873	0.674997	1.39187	< 2.2e-16	< 3.5e-15
Introns transcribed	1.29849	< 2.2e-16	< 3.5e-15	1.43658	< 2.2e-16	< 3.5e-15	1.08159	2.2651e-05	0.000362416	1.32825	< 2.2e-16	< 3.5e-15
3'UTRs non-transcribed	1.33506	< 2.2e-16	< 3.5e-15	1.55351	< 2.2e-16	< 3.5e-15	1.10257	0.0209129	0.334606	1.40891	3.0502e-10	4.88032e-09
3'UTRs transcribed	1.1819	1.34664e-11	2.15463e-10	1.28206	5.58946e-15	0	1.0496	0.214548	1	1.22147	4.89626e-05	0.000783402
Downstream regions	1.29118	< 2.2e-16	< 3.5e-15	1.4064	< 2.2e-16	< 3.5e-15	1.10778	0.000720538	0.0115286	1.26952	5.04731e-11	8.0757e-10
Non-genic functional regions
Replication origins	1.34789	< 2.2e-16	< 3.5e-15	1.502	< 2.2e-16	< 3.5e-15	1.06907	< 2.2e-16	< 3.5e-17	1.40499	< 2.2e-16	< 3.5e-15
FANTOM Enhancers	1.3477	< 2.2e-16	< 3.5e-15	1.47224	< 2.2e-16	< 3.5e-15	1.10399	0.530573	1	1.33351	5.85885e-13	0
TAD boundary regions	1.30954	< 2.2e-16	< 3.5e-15	1.45761	< 2.2e-16	< 3.5e-15	1.0978	< 2.2e-16	< 3.5e-17	1.3277	< 2.2e-16	< 3.5e-15
ENCODE Enhancers	1.23	< 2.2e-16	< 3.5e-15	1.36	< 2.2e-16	< 3.5e-15	1.06	6.11e-07	9.776e-06	1.28	< 2.2e-16	< 3.5e-15
*Non-coding non-repetitive subgenome

## Sheet: Table S7
Table S7. Folded site frequency spectrum (SFS). Comparison of the distribution of minor allele frequencies in G4s and the genic components (or non-genic functional regions) they are harbored by.
It was computed with the Kolmogorov-Smirnov test (p-values are shown). P-values were adjusted for multiple testing using the Bonferroni correction.
	SFS p-value (KS test)			SFS adjusted p-value (Bonferroni correction)
	Stable	Unstable	All	Stable	Unstable	All
Components or regions
NCNR*	4.12e-10	0.05207	3.035e-08	5.768e-09	0.72898	4.249e-07
Genic components
Upstream regions	< 2.2e-16	4.421e-07	< 2.2e-16	< 3.08e-15	6.1894e-06	< 3.08e-15
CpG islands	< 2.2e-16	0.002847	< 2.2e-16	< 3.08e-15	0.039858	< 3.08e-15
5' UTR non-transcribed	3.664e-06	0.003958	1.159e-07	5.1296e-05	0.055412	1.6226e-06
5' UTR transcribed	1.295e-10	0.993	2.129e-07	1.813e-09	1	2.9806e-06
Exons transcribed	7.954e-05	0.03487	2.022e-05	0.00111356	0.48818	0.00028308
Introns non-transcribed	< 2.2e-16	2.793e-05	< 2.2e-16	< 3.08e-15	0.00039102	< 3.08e-15
Introns transcribed	< 2.2e-16	1.332e-15	< 2.2e-16	< 3.08e-15	0	< 3.08e-15
3'UTRs non-transcribed	4.522e-07	0.02361	< 2.2e-16	6.3308e-06	0.33054	< 3.08e-15
3'UTRs transcribed	0.07669	0.6326	< 2.2e-16	1	1	< 3.08e-15
Downstream regions	< 2.2e-16	0.00118	< 2.2e-16	< 3.08e-15	0.01652	< 3.08e-15
Non-genic functional regions
Replication origins	< 2.2e-16	1.161e-12	< 2.2e-16	< 3.08e-15	0	< 3.08e-15
Enhancers	2.376e-12	0.0001994	2.109e-15	0	0.0027916	0
TAD boundary regions	< 2.2e-16	< 2.2e-16	< 2.2e-16	< 3.08e-15	< 3.08e-15	< 3.08e-15

## Sheet: Table S8
Table S8. The comparison of polymorphism (A, SNPs) and divergence (B, FNSs) rates in vs. outside of G4s in upstream regions, enhancers, and Non-Coding Non-Repetitive Regions (NCNR).
A Diversity
Components or regions	Diversity in stable G4s	Diversity in unstable G4s	Diversity in G4s	Diversity outside of G4s	Odds ratio (G4 vs. non-G4)	P for Fisher's exact test for rate comparison
Upstream regions	0.0054	0.0024	0.0043	0.001	4.17	<2.2e-16
Enhancers	0.005	0.0017	0.0038	0.0006	6.12	<2.2e-16
NCNR	0.004	0.0017	0.0026	0.0007	3.48	<2.2e-16
B Divergence
Components or regions	Divergence in stable G4s	Divergence in unstable G4s	Divergence in G4s	Divergence outside of G4s	Odds ratio (G4 vs. non-G4)	P for Fisher's exact test for rate comparison
Upstream regions	0.0228	0.0182	0.0211	0.0178	1.19	<2.2e-16
Enhancers	0.0272	0.0199	0.0242	0.0176	1.38	<2.2e-16
NCNR	0.026	0.0206	0.0228	0.0138	1.64	<2.2e-16

## Sheet: Table S9
Table S9. Shared G4 base pairs between different regions of interest.
The proportion of G4 bases from a group of components or regions in columns also annotated as elements/regions in rows.
	Upstream regions	Validated promoters	CpG islands	5'UTRs	Exons	Introns	3' UTRs	Downstream regions	Replication origins	eQTLs	Enhancers	TAD boundary regions	Recombination hotspots
NCNR	0	0	0	0	0	0	0	0	0	0	0	0	0
Upstream regions		0.322143	0.268535	0.100698	0.0276154	0.0238173	0.0417819	0.0934661	0.0864032	0.0913253	0.0352021	0.058412	0.0662254
Validated promoters (FANTOM)	0.0527851		0.0575606	0.168441	0.0318508	0.00456388	0.0352437	0.0139345	0.013552	0.0147045	0.0111471	0.010165	0.00967154
CpG islands	0.498196	0.651719		0.616384	0.323114	0.0934142	0.134228	0.146898	0.0629377	0.151947	0.179112	0.107317	0.122451
5'UTRs	0.0371073	0.378814	0.122432		0.0448883	0.00692526	0.0724694	0.0295038	0.0292259	0.151947	0.00178458	0.0211	0.0215356
Exons	0.011228	0.079033	0.0708124	0.0495272		0.00279951	0.0307371	0.0295506	0.0354105	0.0216869	0.000268553	0.0244504	0.0203061
Introns	0.208893	0.244289	0.441618	0.164827	0.0603897		0.0973579	0.223852	0.537647	0.550264	0.463236	0.500421	0.46159
3' UTRs	0.0181839	0.0936093	0.031488	0.0855883	0.0329011	0.00483102		0.0422562	0.0322237	0.035929	0.00210294	0.0266638	0.0291785
Downstream regions	0.0384508	0.0349849	0.0325738	0.0329374	0.0298996	0.0104998	0.0399431		0.0137809	0.0403681	0.0183591	0.0234983	0.0172325
Replication origins	0.694813	0.665089	0.705415	0.637773	0.700356	0.49295	0.595406	0.638637		0.546888	0.637945	0.47901	0.47659
eQTLs	0.00151969	0.651719	0.00136288	0.00137813	0.000887583	0.001044	0.00137375	0.00163287	0.00113168		0.000892289	0.000898345	0.00106551
Enhancers	0.0125068	0.00149332	0.0343009	0.00172058	0.00023467	0.0187651	0.00171675	0.0158554	0.0281854	0.0190511		0.0224247	0.0231133
TAD boundary regions	0.275475	0.292568	0.272804	0.270037	0.283607	0.269082	0.288937	0.26938	0.280923	0.254601	0.297665		0.274758
Recombination hotspots	0.0024869	0.00221649	0.00247856	0.00219457	0.00187547	0.00197633	0.00251766	0.00157301	0.00222556	0.00240451	0.00244296	0.00218778

## Sheet: Table S10
Table S10. Dispersion in computation of G4 density and coverage. 10 iterations of computation of coverage and density after random choice of unique annotations in overlapping sets.
(A) DENSITY
Components or regions	Mean	Standard Deviation	Iteration 1	Iteration 2	Iteration 3	Iteration 4	Iteration 5	Iteration 6	Iteration 7	Iteration 8	Iteration 9	Iteration 10
NCNR*	0.0318075	0	0.0318075	0.0318075	0.0318075	0.0318075	0.0318075	0.0318075	0.0318075	0.0318075	0.0318075	0.0318075
Genic components
Upstream	0.578759	0.000767858	0.577717	0.579024	0.579326	0.577639	0.578632	0.57981	0.578673	0.579856	0.578625	0.578286
Validated promoters (FANTOM)	0.703185	0.000405799	0.703706	0.703128	0.703223	0.703443	0.702933	0.703281	0.703277	0.702261	0.703596	0.702999
CpG islands	1.43464	0	1.43464	1.43464	1.43464	1.43464	1.43464	1.43464	1.43464	1.43464	1.43464	1.43464
5'UTR non-translated	0.411995	0.00126721	0.412048	0.412289	0.411173	0.410857	0.413227	0.409645	0.411974	0.411792	0.412792	0.414157
5'UTR translated	0.478124	0.00105913	0.480044	0.477616	0.476843	0.478226	0.477976	0.47749	0.477549	0.479609	0.477086	0.478805
Exons non-transcribed	0.117596	0.000279187	0.117188	0.117962	0.117913	0.117848	0.117752	0.117604	0.117276	0.117277	0.117633	0.117509
Exons transcribed	0.290192	0.000253762	0.29009	0.290294	0.289811	0.290274	0.290557	0.29007	0.290323	0.290569	0.289954	0.289984
Introns non-transcribed	0.141602	0.000402811	0.141261	0.141261	0.141729	0.141844	0.140811	0.141883	0.142226	0.141497	0.141755	0.141755
Introns transcribed	0.125025	0.000333835	0.124947	0.124947	0.125073	0.125406	0.124298	0.124993	0.125566	0.125089	0.125037	0.124896
3' UTRs non-transcribed	0.206218	0.00066588	0.206146	0.206146	0.207262	0.205979	0.207048	0.206586	0.204869	0.205795	0.206115	0.206234
3' UTRs transcribed	0.261777	0.00084843	0.262119	0.262119	0.262735	0.261232	0.261566	0.262746	0.260916	0.262766	0.260359	0.261212
Downstream regions	0.256213	0.000151241	0.256152	0.256152	0.256342	0.256307	0.256354	0.256069	0.255912	0.256218	0.256417	0.25621
Non-genic functional regions
Replication origins	0.80027	1.97653e-06	0.800269	0.800269	0.80027	0.800274	0.800274	0.800269	0.800269	0.80027	0.80027	0.80027
eQTLs	0.240612	0.000255356	0.240292	0.240292	0.240672	0.240709	0.2406	0.240952	0.240984	0.240563	0.240748	0.240306
Enhancers	0.352745	0	0.352745	0.352745	0.352745	0.352745	0.352745	0.352745	0.352745	0.352745	0.352745	0.352745
TAD boundary regions	0.155336	0.000513237	0.155786	0.155786	0.15489	0.15548	0.154656	0.154429	0.155188	0.155714	0.155774	0.155656
Recombination hotspots	0.148824	0	0.148824	0.148824	0.148824	0.148824	0.148824	0.148824	0.148824	0.148824	0.148824	0.148824
(B) COVERAGE
Components or regions	Mean	Standard Deviation	Iteration 1	Iteration 2	Iteration 3	Iteration 4	Iteration 5	Iteration 6	Iteration 7	Iteration 8	Iteration 9	Iteration 10
NCNR*	0.00108721	0	0.00108721	0.00108721	0.00108721	0.00108721	0.00108721	0.00108721	0.00108721	0.00108721	0.00108721	0.00108721
Genic components
Upstream	0.0230629	2.66755e-05	0.023031	0.0230961	0.0230887	0.0230393	0.0230565	0.0231051	0.0230618	0.0230722	0.0230363	0.0230417
Validated promoters (FANTOM)	0.0665561	5.08936e-05	0.0665753	0.0665783	0.066571	0.0665423	0.0665711	0.0665253	0.0665951	0.0664641	0.0666418	0.0664967
CpG islands	0.0577885	0	0.0577885	0.0577885	0.0577885	0.0577885	0.0577885	0.0577885	0.0577885	0.0577885	0.0577885	0.0577885
5'UTR non-translated	0.015408	4.67821e-05	0.0153964	0.0154475	0.0153831	0.0153746	0.0154503	0.0153162	0.0154129	0.0153843	0.0154412	0.015474
5'UTR translated	0.0184964	3.81281e-05	0.0185785	0.0184759	0.0184606	0.0185141	0.0184781	0.0184707	0.0184714	0.0185331	0.0184654	0.0185162
Exons non-transcribed	0.00440273	1.064e-05	0.00438465	0.00441169	0.00441703	0.00441386	0.00440927	0.00439926	0.00439281	0.00439254	0.0044067	0.00439946
Exons transcribed	0.011342	1.19456e-05	0.0113354	0.011345	0.0113178	0.0113427	0.0113569	0.011331	0.0113509	0.011353	0.0113363	0.0113505
Introns non-transcribed	0.00531575	1.46455e-05	0.00531605	0.00531553	0.00532068	0.0053092	0.00528725	0.00533029	0.00534319	0.00530665	0.00531443	0.00531422
Introns transcribed	0.0046457	1.28886e-05	0.00464516	0.00464693	0.00465105	0.00465314	0.00462175	0.00464654	0.00467198	0.00464589	0.00463813	0.00463638
3' UTRs non-transcribed	0.00714321	2.62943e-05	0.00713305	0.00713364	0.00716857	0.00711697	0.00718823	0.00716298	0.00710205	0.00712265	0.00715386	0.00715013
3' UTRs transcribed	0.00943487	3.39536e-05	0.00947765	0.0094403	0.00947069	0.009419	0.00942847	0.00947302	0.00938765	0.00945533	0.00938937	0.00940721
Downstream regions	0.00956016	6.76804e-06	0.00956094	0.00955569	0.00956214	0.00956918	0.00956382	0.00955476	0.00955018	0.00955585	0.00957185	0.00955715
Non-genic functional regions
Replication origins	0.0313246	1.24458e-07	0.0313248	0.0313245	0.0313245	0.0313248	0.0313248	0.0313245	0.0313245	0.0313245	0.0313245	0.0313245
eQTLs	0.00905514	9.30938e-06	0.00905787	0.00905409	0.0090531	0.00905052	0.00906542	0.00906149	0.00906781	0.00904655	0.00905832	0.00903628
Enhancers	0.0128267	0	0.0128267	0.0128267	0.0128267	0.0128267	0.0128267	0.0128267	0.0128267	0.0128267	0.0128267	0.0128267
TAD boundary regions	0.00564352	2.11773e-05	0.00566894	0.00565966	0.00562104	0.00564545	0.00561868	0.00560767	0.00564099	0.00565314	0.00566641	0.00565324
Recombination hotspots	0.00551927	0	0.00551927	0.00551927	0.00551927	0.00551927	0.00551927	0.00551927	0.00551927	0.00551927	0.00551927	0.00551927
*Non-coding non-repetitive subgenome
